# Supplementary material for: Hydrogen-intercalation PdZn bimetallene for urea electro-synthesis from nitrate and carbon dioxide
Source: Royal Society of Chemistry journal article supplement (doi:10.1039/d4ta04802d), 2024-11-13
Supplement: d4ta04802d1.pdf [file d4ta04802d1.pdf]

Electronic Supplementary Information for

**Hydrogen-intercalation PdZn bimetallic for urea electro-synthesis from nitrate  
and carbon dioxide**

Ziqiang Wang, Yanan Wang, Shan Xu, Kai Deng, Hongjie Yu, You Xu,

Hongjing Wang\* and Liang Wang\*

State Key Laboratory Breeding Base of Green-Chemical Synthesis Technology, College of  
Chemical Engineering, Zhejiang University of Technology, Hangzhou 310014, P. R. China

E-mails: [hjw@zjut.edu.cn](mailto:hjw@zjut.edu.cn); [wangliang@zjut.edu.cn](mailto:wangliang@zjut.edu.cn)

## Characterizations

Scanning electron microscopy (SEM, ZEISS Gemini 500) and transmission electron microscopy (TEM, JEOL JEM-2100F) were used to characterize the microscopic morphology of the catalyst. The crystal structure of the catalysts was determined by X-ray diffraction (XRD, DX-2700). X-ray photoelectron spectroscopy (XPS, ULVAC PHI Quantera) was used to determine the chemical states of the elements in the catalysts. The thickness of the catalyst was measured using an atomic force microscope (AFM, NT-MDT Prima). Nuclear magnetic resonance (NMR) spectra were obtained using a superconducting magnet NMR spectrometer (Germany Bruker 600MHz).

## Product determination

The urea was measured by the diacetyl monoxime method.<sup>1</sup> Firstly, 30 mL H<sub>2</sub>SO<sub>4</sub> and 10 mL H<sub>3</sub>PO<sub>4</sub> were added to 60 mL deionized water, and then 10 mg FeCl<sub>3</sub> was dissolved in the above solution (solution A). Then, 0.5 g of DAMO and 10 mg of TSC were dissolved in 100 mL deionized water (solution B). After that, 80 μL of electrolysis solution was taken from cell and diluted into 1 mL solution, mixing with 2 mL of solution A and 1 mL of solution B on heating at 110 °C for 15 min. The absorbance of mixed solution was measured at 525 nm using UV-vis spectrophotometer. The R<sub>urea</sub> and FE<sub>urea</sub> of urea synthesis were calculated by the following equations:

$$R_{\text{urea}} = C_{\text{urea}} \times V / (t \times m) \quad (1-1)$$

$$FE_{\text{urea}} = (16 \times F \times C_{\text{urea}} \times V) / (60.06 \times Q) \times 100\% \quad (1-2)$$

where C<sub>urea</sub> and V are the measured concentration of urea and the total volume of the cathodic electrolyte, respectively; t is the reduction time and m is the metal of the loaded electrocatalyst; F is the Faraday constant (96,485 C mol<sup>-1</sup>), Q (C) is the total electric quantity during each current

passage.

The concentration of product  $\text{NH}_3$  was determined by indophenol blue method.<sup>2</sup> Firstly, the electrolyte is removed from the cell and diluted into 2 mL solution, followed by adding 2 mL of 1 M NaOH solution containing 5 wt%  $\text{C}_7\text{H}_6\text{O}_3$  and 5 wt%  $\text{C}_6\text{H}_5\text{Na}_3\text{O}_7$ , 1 mL of 0.05 M NaClO solution and 0.2 mL of 1 wt%  $\text{C}_5\text{FeN}_6\text{Na}_2\text{O}$  solution. After reaction for 2 h at room temperature, the absorbance of mixed solution was measured using UV-vis spectrophotometer at a wavelength of 655 nm. The  $R_{\text{NH}_3}$  and  $\text{FE}_{\text{NH}_3}$  of ammonia synthesis were calculated using the following equations:

$$R_{\text{NH}_3} = C_{\text{NH}_3} \times V / (t \times m) \quad (1-3)$$

$$\text{FE}_{\text{NH}_3} = 8 \times F \times C_{\text{NH}_3} \times V / (17 \times Q) \times 100\% \quad (1-4)$$

where  $C_{\text{NH}_3}$  is the measured  $\text{NH}_3$  concentrations, respectively;  $V$  is the total volume of electrolyte,  $t$  is the time for electrocatalysis and  $m$  is the catalyst loading.  $F$  is the Faraday constant (96,485 C mol<sup>-1</sup>); and  $Q$  (C) is the total charge passed through the working electrode.

The determination of  $\text{NO}_2^-$  was based on the reported literatures.<sup>1,3</sup> In detail, 0.4 g  $\text{C}_6\text{H}_8\text{N}_2\text{O}_2\text{S}$  and 0.02 g  $\text{C}_{12}\text{H}_{14}\text{N}_2 \cdot 2\text{HCl}$  were dissolved in 1 mL  $\text{H}_3\text{PO}_4$  and 5 mL deionized water to prepare the color reagent. Then 0.1 mL of the color reagent was mixed with the 5 mL diluted electrolyte for 20 min. The absorbance of mixed solution at a wavelength of 540 nm was measured by UV-vis spectrophotometry. The calibration curve was obtained using a series of standard  $\text{KNO}_2$  solutions and the FE of  $\text{NO}_2^-$  was calculated using the following equation:

$$\text{FE}_{\text{NO}_2^-} = (2 \times F \times C_{\text{NO}_2^-} \times V) / (46 \times Q) \times 100\% \quad (1-5)$$

where  $F$  is the Faraday constant (96,485 C·mol<sup>-1</sup>), where  $C$  is the measured concentration of  $\text{NO}_2^-$  and  $Q$  is the quantity charge (C).

The amounts of CO and  $\text{H}_2$  were quantified using an in-line gas chromatograph (GC, GC-2014

Shimadzu).

## **The calculation of hydrogen content**

The hydrogen content in H-PdZn bimetallic can be calculated according to Vegard's law.<sup>4</sup> A more descriptive description is given by the relationship between lattice parameters and the composition of palladium hydride, as shown in Fig. S4. The H content ( $x$ ) is proportional to the guest atom ( $x=H/(Pd+Zn)$ ), and the H content can be calculated from the lattice expansion (lattice parameter,  $a$ ) caused by the introduction of H according to the Vegard's law ( $a = a_0 + 0.19x$  (Å)), where  $a_0$  is the lattice constant (3.868 Å) of PdZn bimetallic. The constant 0.19 is derived from the lattice parameters of Pd (PDF# 46-1043), PdH<sub>0.43</sub> (PDF# 87-0637) and PdH<sub>0.706</sub> (PDF# 18-0951) according to Vegard's law.

## **The determination of d-band center**

The Pd d-band center was determined from valence band spectrum with the Shirley background subtraction according to a model presented in the literatures ( $d$  band center =  $\int N(\epsilon)\epsilon d\epsilon / \int N(\epsilon) d\epsilon$ ,<sup>5,6</sup> where  $N(\epsilon)$  is the XPS-intensity after background subtraction).

## **Theoretical calculations**

We utilized the Vienna ab initio simulation package (VASP) to perform density functional theory (DFT) calculations, utilizing projector augmented wave (PAW) potentials and setting a plane-wave cutoff energy at 520 eV.<sup>7-9</sup> The exchange-correlation functional was employed by generalized gradient approximation (GGA) functional of Perdew, Burke, and Ernzerhof (PBE) with Grimme's semiempirical DFT-D3 dispersion correction to account for van der Waals (vdW) interactions.<sup>10</sup> Energy and force convergence criteria for structure optimization were set to  $10^{-5}$  eV and  $0.02$  eV Å<sup>-1</sup>, respectively. A bulk Pd model was constructed using the Fm-3m space group, followed by the

creation of a four-layer supercell for the Pd(111) model, with the vacuum layer of 16 Å. Subsequently, a certain amount of Zn atoms was randomly replaced with Pd atoms to build the PdZn(111) model. Then H atoms were embedded into the lattice of Pd to establish H-PdZn(111) model. The Gibbs free energy change ( $\Delta G$ ) for urea electrosynthesis was determined using the formula ( $\Delta G = \Delta E + \Delta ZPE - T\Delta S$ ), where  $\Delta E$  represented the difference of the adsorption energy, while  $\Delta ZPE$  and  $\Delta S$  signify the changes of zero-point energy and entropy, respectively. The computational hydrogen electrode (CHE) model was used for the  $\Delta G$  of the electrochemical reaction steps.<sup>11</sup> The VASPkit code was employed for post-processing of the computational data,<sup>12</sup> while the VESTA package was used for visualization of the crystal structure.<sup>13</sup>

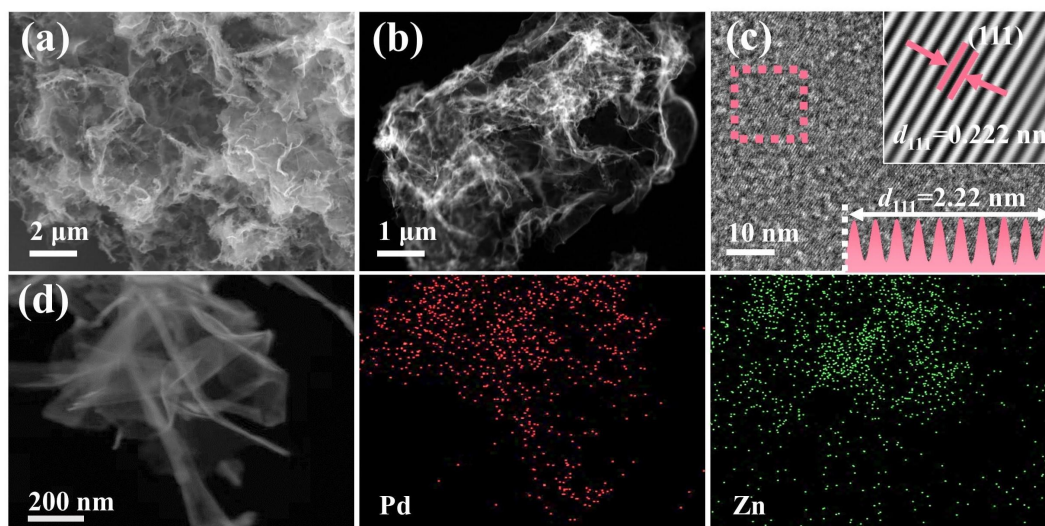

**Fig. S1** (a) SEM and (b) HAADF-TEM images of PdZn bimetallic nanowires. (c) HRTEM image and the insets in (c) are the corresponding FFT pattern and the lattice distance. (d) HAADF-STEM image and the corresponding elemental mapping images of PdZn bimetallic nanowires.

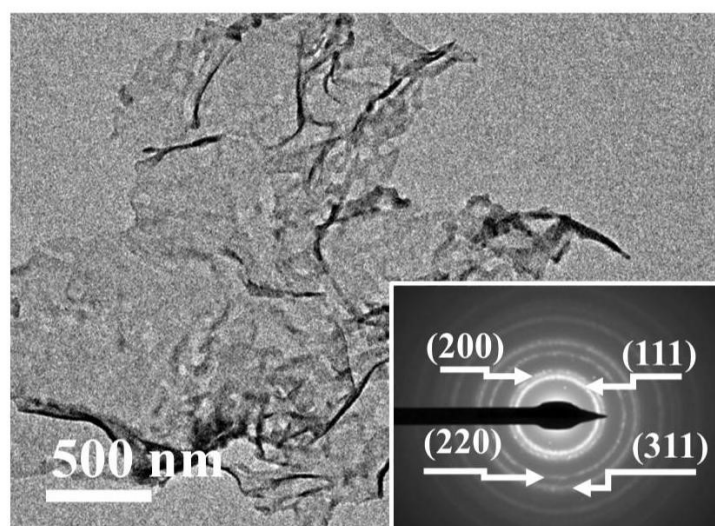

**Fig. S2** TEM image of H-PdZn bimetallic nanowires and corresponding SAED pattern.

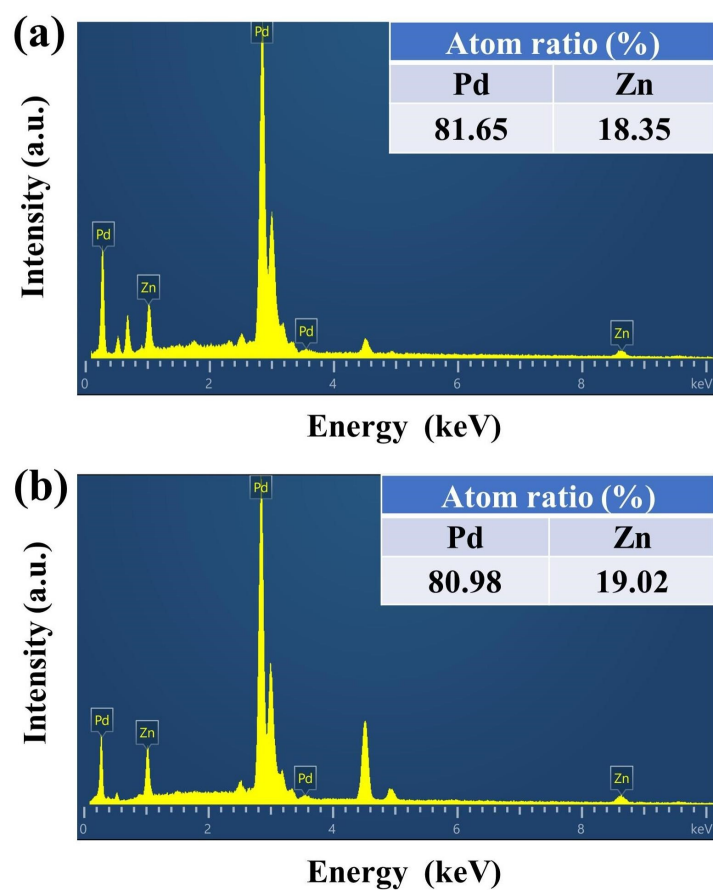

**Fig. S3** The EDS spectra of samples and corresponding atom ratios of Pd and Zn.

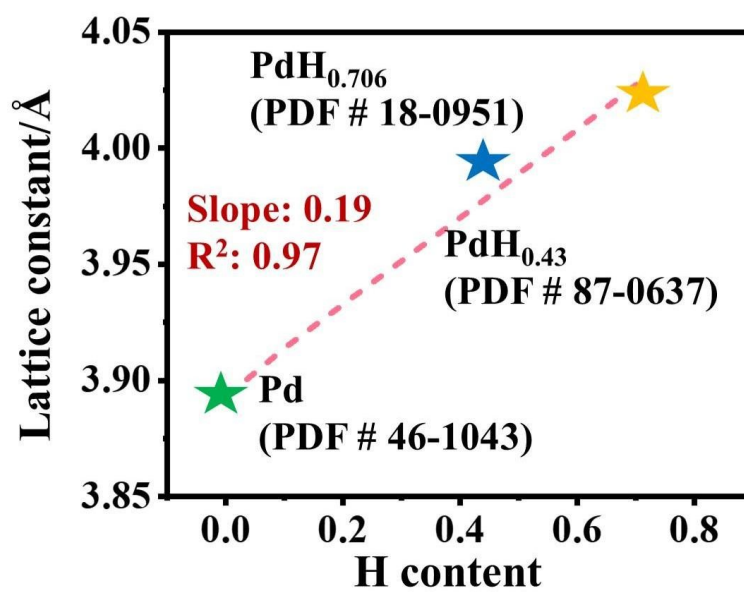

**Fig. S4** The relationship between lattice constant and H content for PdH<sub>x</sub>.

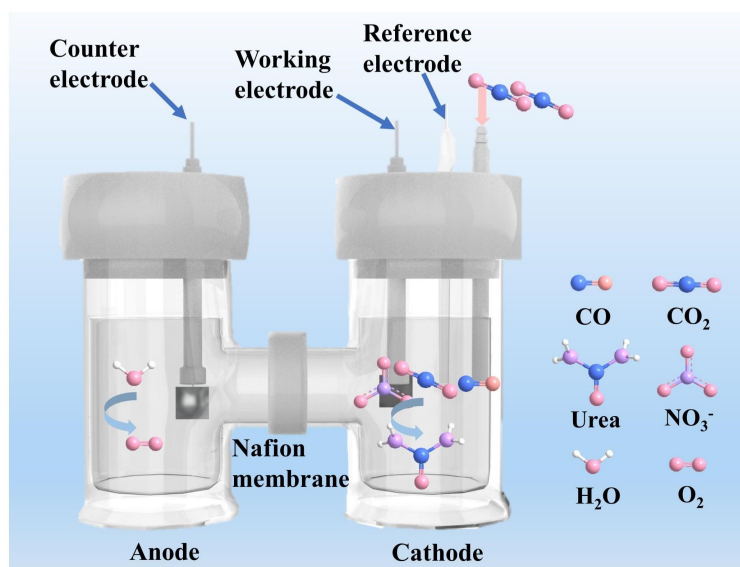

**Fig. S5** Scheme of the urea electro-synthesis by coupling CO<sub>2</sub>RR with NO<sub>3</sub>RR on H-PdZn bimetallic.

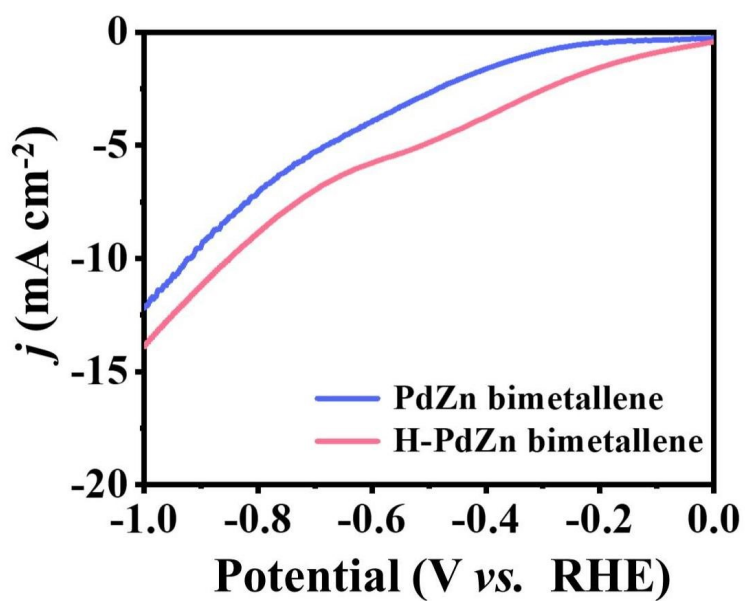

**Fig. S6** LSV curves of H-PdZn bimetallic and PdZn bimetallic in 0.1 M KNO<sub>3</sub> electrolyte with CO<sub>2</sub> feeding.



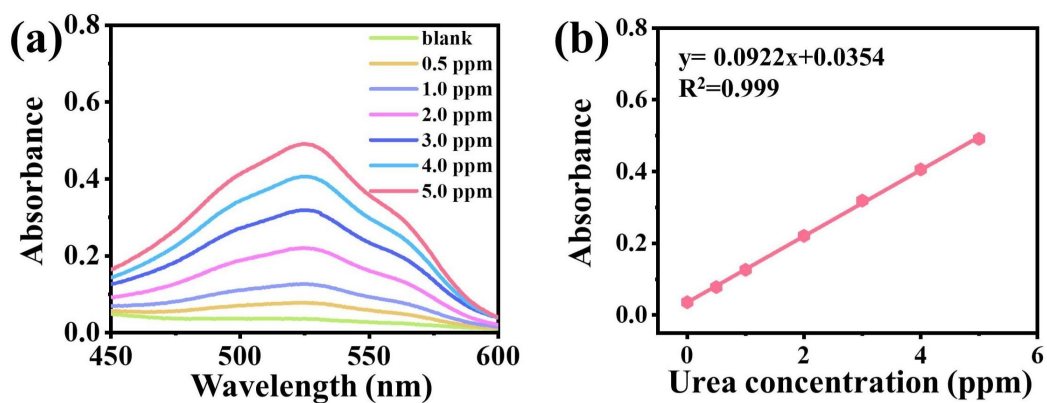

**Fig. S7** (a) UV-vis absorption spectra of different concentrations of urea solutions (0, 0.5, 1.0, 2.0, 3.0, 4.0 and 5.0 ppm) after heating at 110 °C for 15 min. (b) Calibration curve used to estimate concentration of urea.

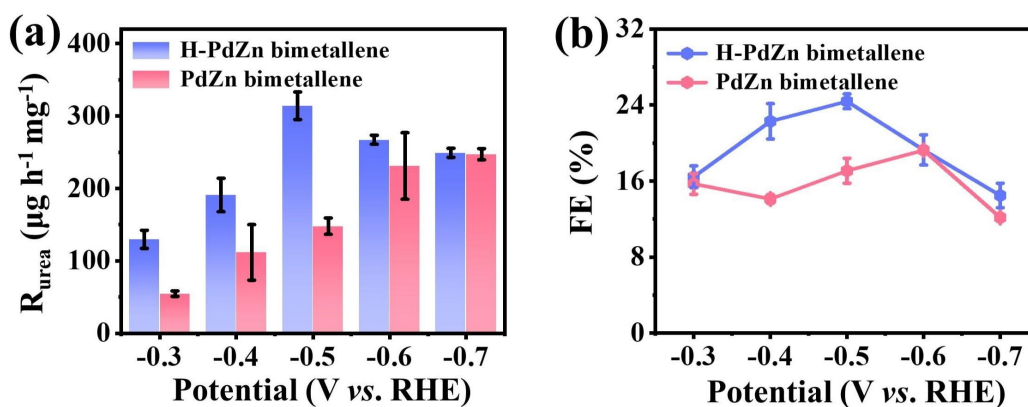

**Fig. S8** (a)  $R_{\text{urea}}$  values of samples at different potentials in 0.1 M  $\text{KNO}_3$  electrolyte with  $\text{CO}_2$  feeding. (b) Faraday efficiencies of samples at -0.5 V.

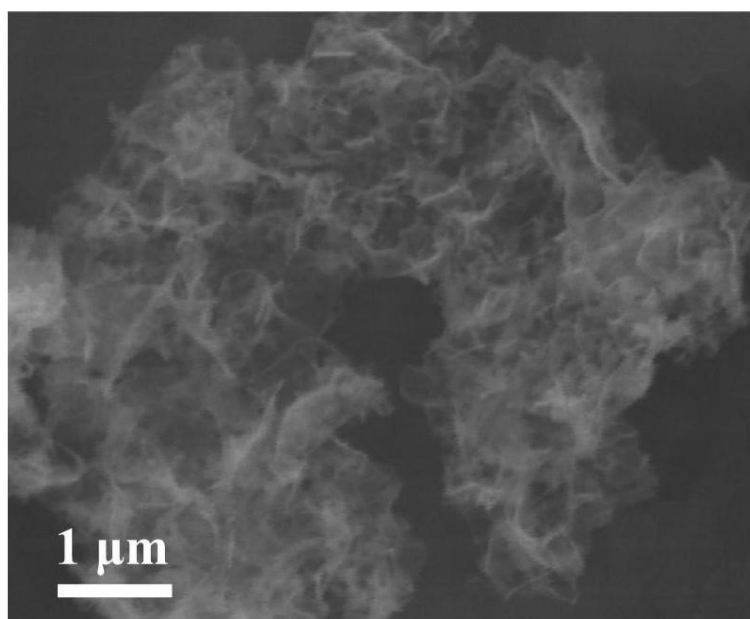

**Fig. S9** (a) SEM images of H-PdZn bimetallic after testing.

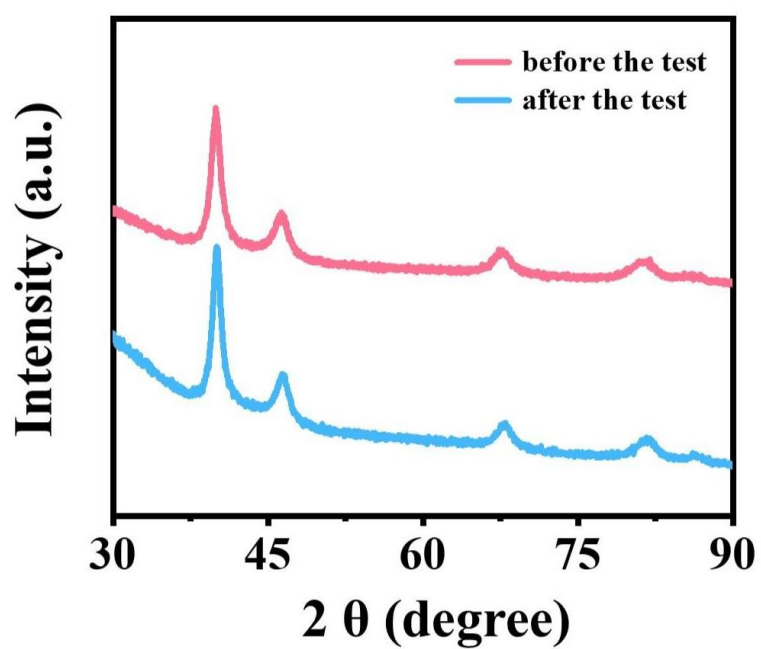

**Fig. S10** (a) XRD images of H-PdZn bimetallic after and before the testing.

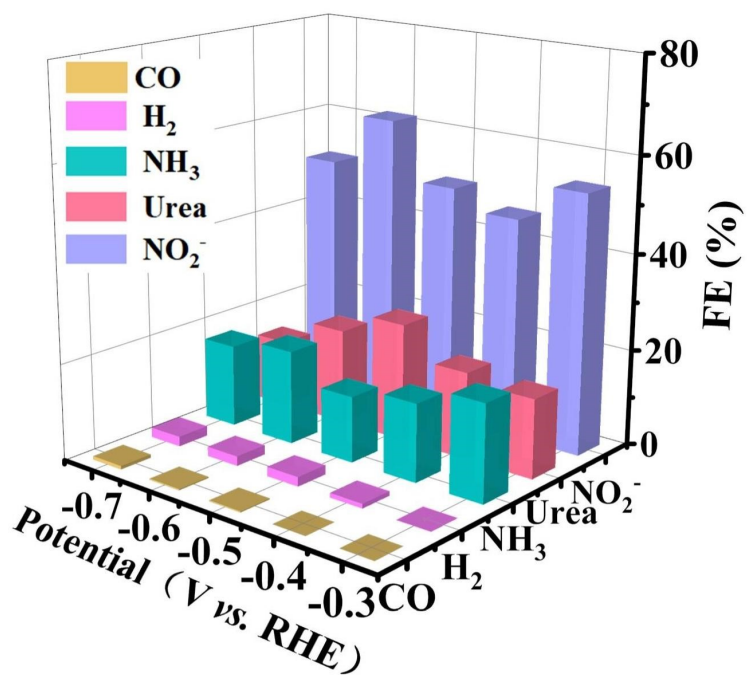

Fig. S11 FE values of different products on the H-PdZn bimetallic at various potentials.

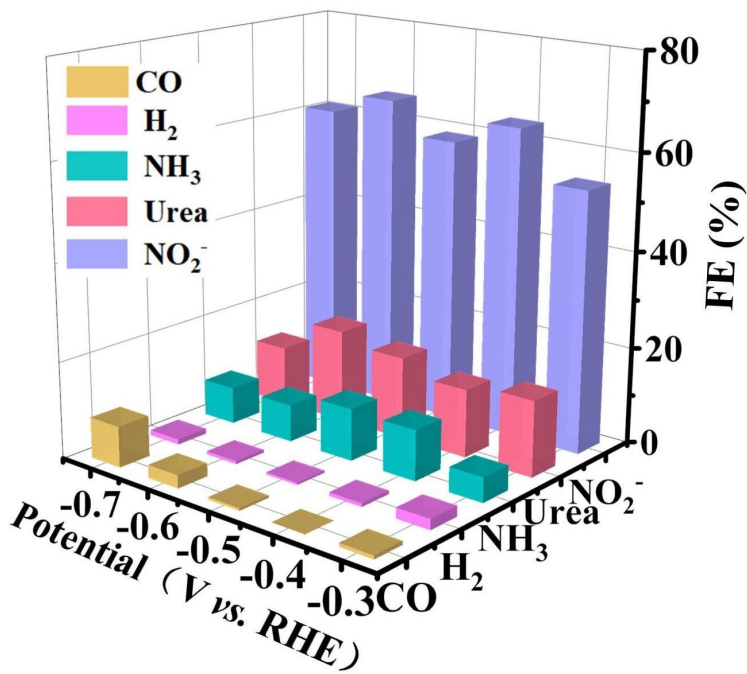

Fig. S12 FE values of different products on the PdZn bimetallic at various potentials.

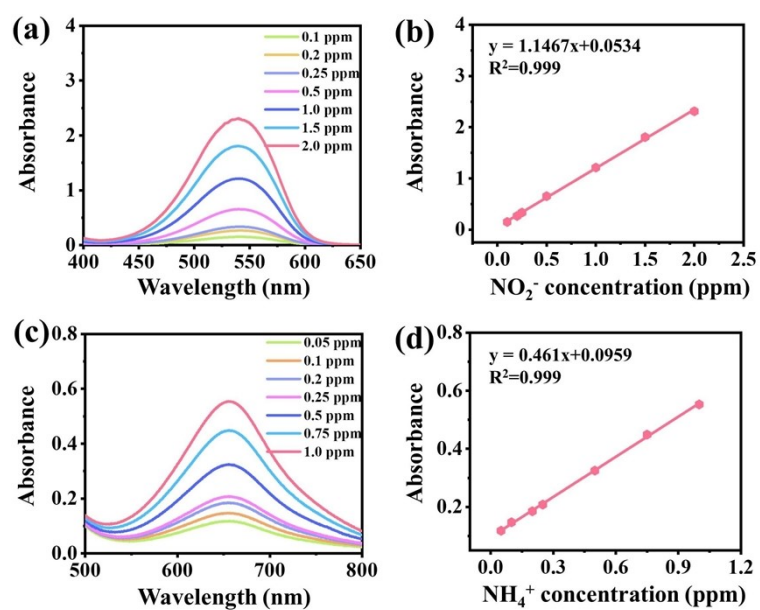

**Fig. S13** (a) UV-vis absorption spectra of different concentrations of  $\text{NO}_2^-$  solutions and (b) corresponding calibration curve. (c) UV-vis absorption spectra of different concentrations of  $\text{NH}_4^+$  solutions and (d) corresponding calibration curve.

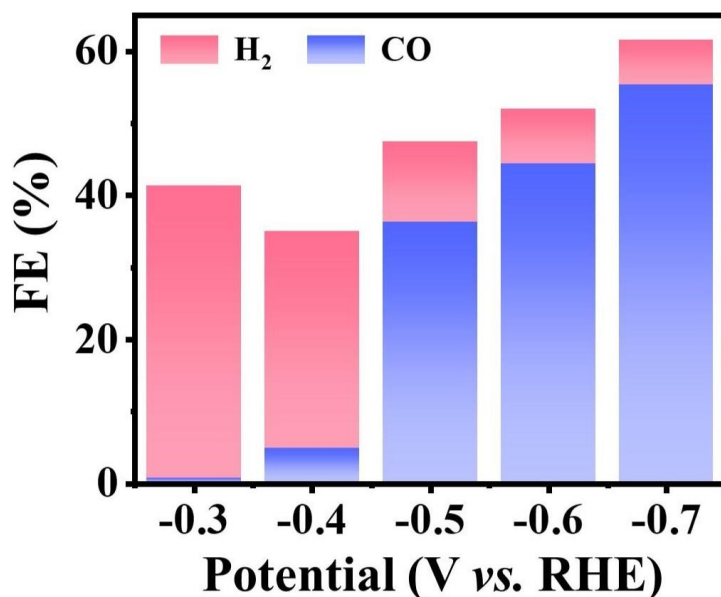

**Fig. S14** FE values of  $\text{H}_2$  and  $\text{CO}$  production after electrolysis in  $\text{CO}_2$ -saturated 0.1 M  $\text{KHCO}_3$ .

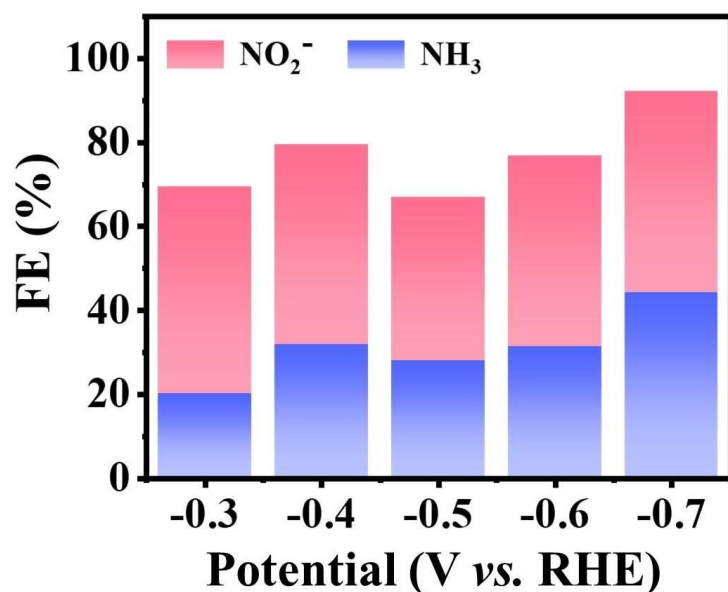

**Fig. S15** FE values of the formation of NO<sub>2</sub><sup>-</sup> and NH<sub>3</sub> after electrolysis in CO<sub>2</sub>-saturated 0.1 M KHCO<sub>3</sub>.

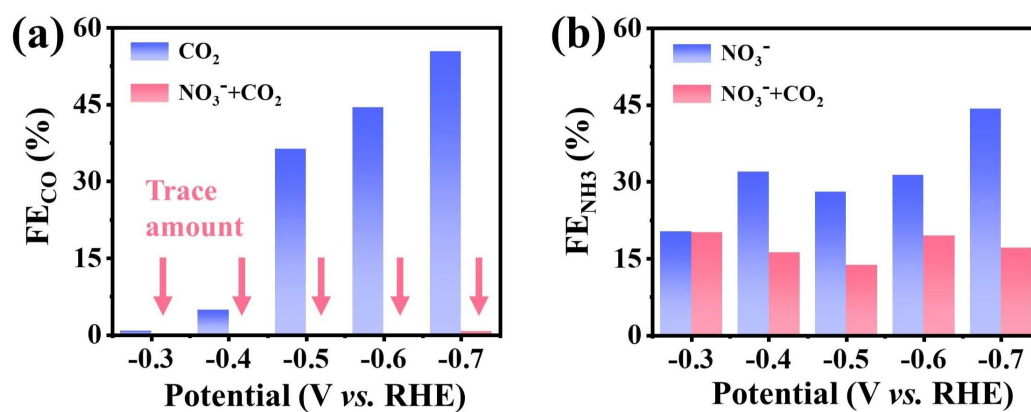

**Fig. S16** (a) Faradaic efficiencies for CO production after electrolysis in 0.1 M KHCO<sub>3</sub> with CO<sub>2</sub> and 0.1 M KNO<sub>3</sub> with CO<sub>2</sub> on H-PdZn bimetallic. (b) Faradaic efficiencies for NH<sub>3</sub> synthesis after electrolysis in KNO<sub>3</sub> without CO<sub>2</sub> and with CO<sub>2</sub> over the H-PdZn bimetallic.

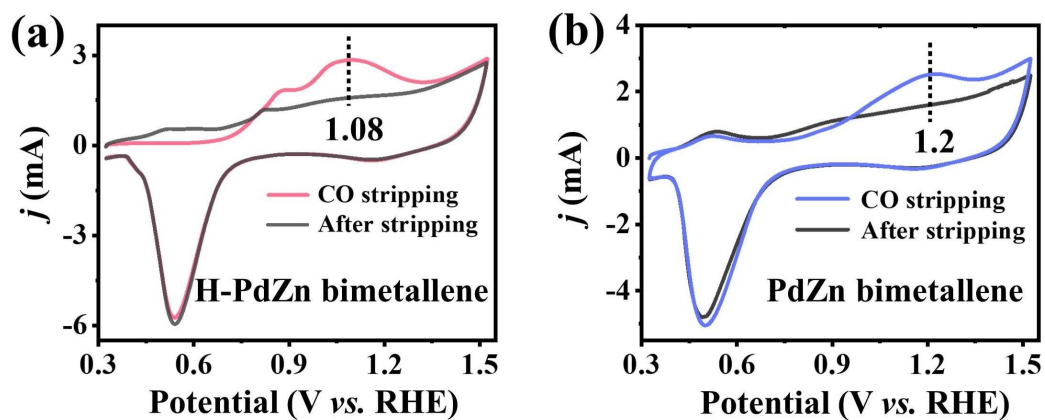

**Fig. S17** CO stripping voltammetry curves of (a) H-PdZn bimetalloxyde and (b) PdZn bimetalloxyde in 1 M KOH with a scan rate of  $50 \text{ mV s}^{-1}$ .

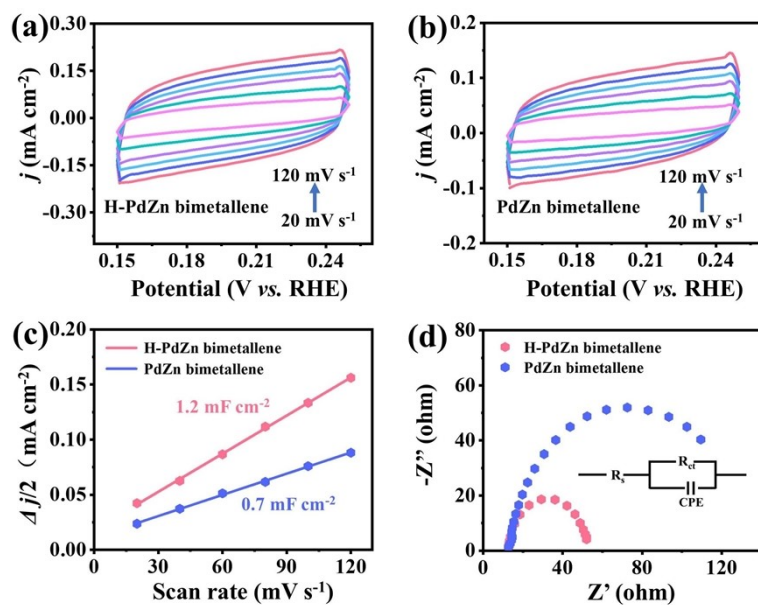

**Fig. S18** Cyclic voltammogram curves for (a) H-PdZn bimetalloxyde (b) PdZn bimetalloxyde at various scan rates. (c) Plots of the current density versus the scan rate for H-PdZn bimetalloxyde and PdZn bimetalloxyde. (d) Nyquist plots of samples at  $-0.5 \text{ V}$  in  $\text{CO}_2$ -saturated  $0.1 \text{ M KNO}_3$ .

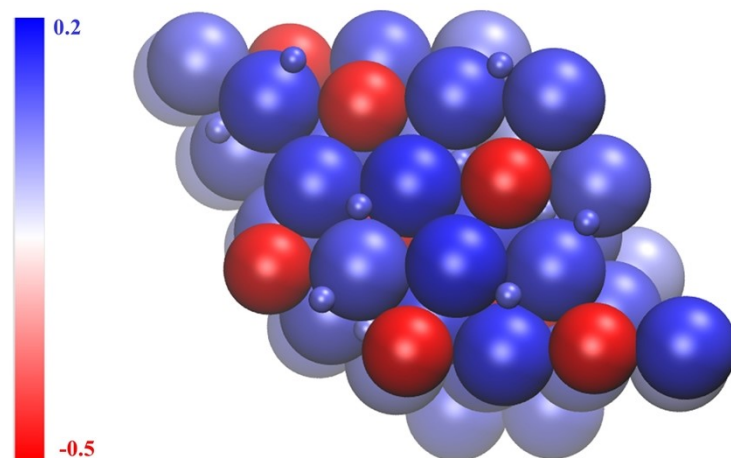

**Fig. S19** Visualizing graph for Bader charge of H-PdZn bimetallic.

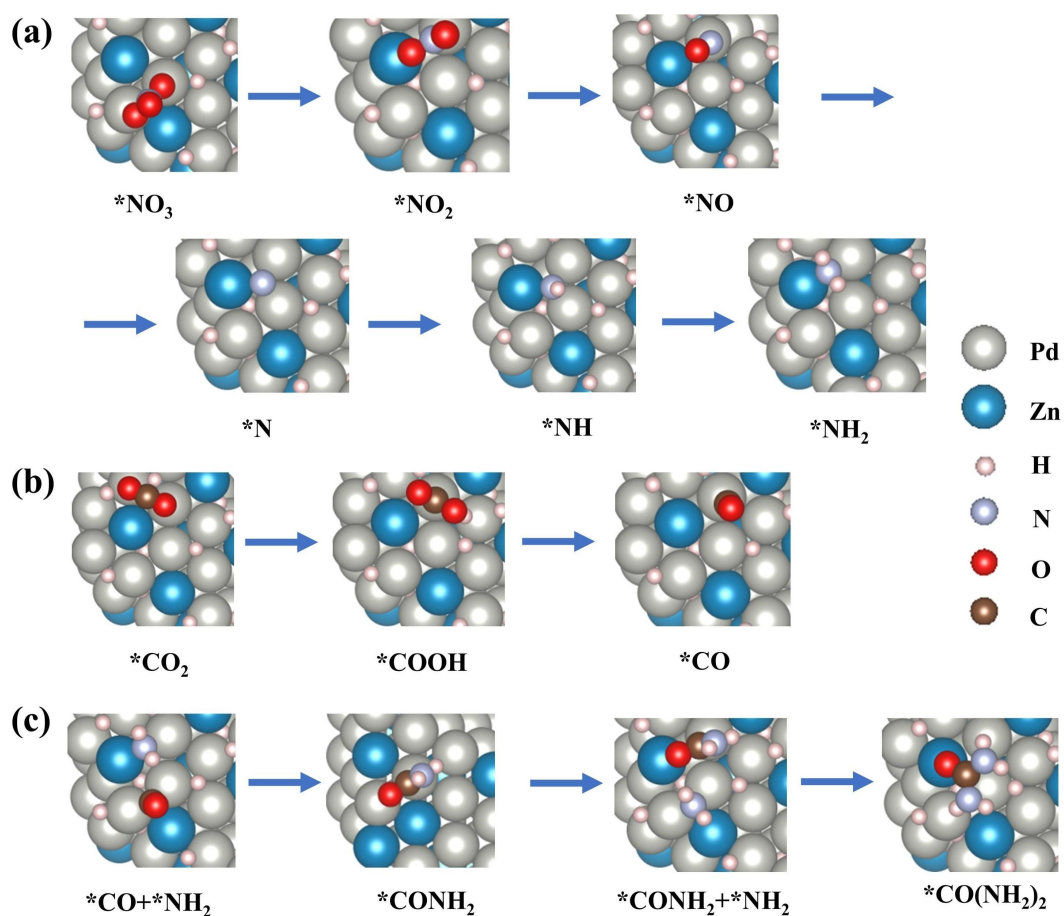

**Fig. S20** Optimized structural models of H-PdZn bimetallic for electrocatalytic (a) nitrate reduction reaction, (b) carbon dioxide reduction reaction and (c) C-N coupling reaction.

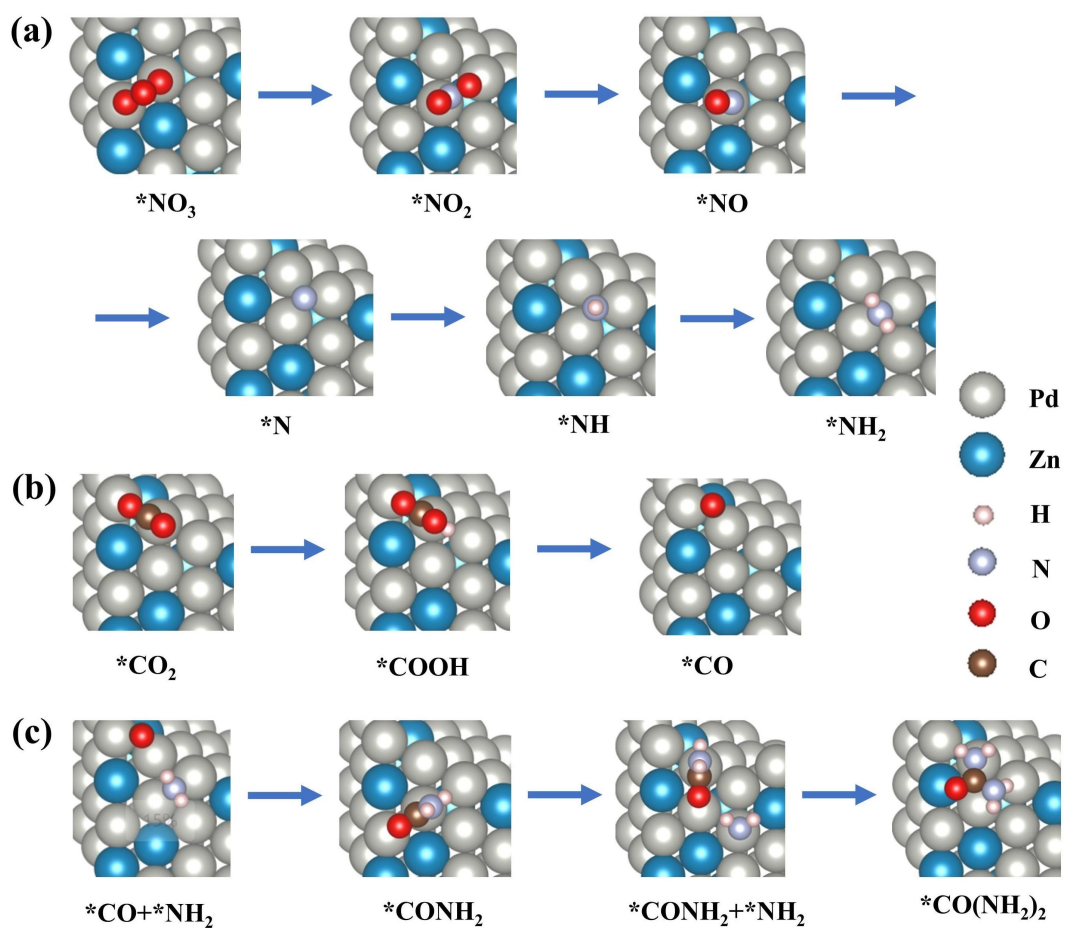

**Fig. S21** Optimized structural models of PdZn bimetallic surface for electrocatalytic (a) nitrate reduction reaction, (b) carbon dioxide reduction reaction and (c) C-N coupling reaction.



**Table S1.** Electrocatalytic urea synthesis from N<sub>2</sub> and CO<sub>2</sub> co-reduction on heterogeneous catalytic systems in published works.

| Catalyst                                             | Electrolyte             | FE <sub>urea</sub> | R <sub>urea</sub>                         | Potential | Reference |
|------------------------------------------------------|-------------------------|--------------------|-------------------------------------------|-----------|-----------|
| PdCu/TiO <sub>2</sub>                                | 0.1 M KHCO <sub>3</sub> | 8.92               | 3.36 mmol g <sup>-1</sup> h <sup>-1</sup> | -0.4      | 14        |
| Bi/BiVO <sub>4</sub>                                 | 0.1 M KHCO <sub>3</sub> | 12.55              | 5.91 mmol g <sup>-1</sup> h <sup>-1</sup> | -0.4      | 15        |
| BiFeO <sub>3</sub> /BiVO <sub>4</sub>                | 0.1 M KHCO <sub>3</sub> | 17.18              | 4.94 mmol g <sup>-1</sup> h <sup>-1</sup> | -0.4      | 16        |
| Ni <sub>3</sub> (BO <sub>3</sub> ) <sub>2</sub> -150 | 0.1 M KHCO <sub>3</sub> | 20.36              | 9.70 mmol h <sup>-1</sup> g <sup>-1</sup> | -0.5      | 17        |
| Cu-Bi alloy                                          | 0.1 M KHCO <sub>3</sub> | 8.7                | 5.27 mol s <sup>-1</sup> cm <sup>2</sup>  | -0.4      | 18        |
| Rice-like InOOH                                      | 0.1 M KHCO <sub>3</sub> | 20.97              | 6.85 mmol h <sup>-1</sup> g <sup>-1</sup> | -0.4      | 19        |

**Table S2.** Electrocatalytic urea synthesis from nitrogen oxides and CO<sub>2</sub> co-reduction on heterogeneous catalytic systems in published works.

| Catalyst                              | Reactants                                          | FE <sub>urea</sub><br>(%) | R <sub>urea</sub>                               | Potential<br>(V vs. RHE) | Reference        |
|---------------------------------------|----------------------------------------------------|---------------------------|-------------------------------------------------|--------------------------|------------------|
| Te-Pd NCs                             | NO <sub>2</sub> <sup>-</sup> + CO <sub>2</sub>     | 12.2                      | -                                               | -1.1                     | 20               |
| Cu-TiO <sub>2</sub> -Vo               | NO <sub>2</sub> <sup>-</sup> + CO <sub>2</sub>     | 43.1                      | 20.8 μmol h <sup>-1</sup>                       | -0.4                     | 21               |
| ZnO-Vo                                | NO <sub>2</sub> <sup>-</sup> + CO <sub>2</sub>     | 23.26                     | 16.56 μmol h <sup>-1</sup>                      | -0.79                    | 22               |
| Zn nanobelts                          | NO + CO <sub>2</sub>                               | 11.26                     | 15.13 mmol g <sup>-1</sup> h <sup>-1</sup>      | -0.92                    | 23               |
| V <sub>o</sub> -InOOH                 | NO <sub>3</sub> <sup>-</sup> + CO <sub>2</sub>     | 51.0                      | 592.5 μg h <sup>-1</sup> mg <sup>-1</sup>       | -0.5                     | 2                |
| Cu@Zn                                 | NO <sub>3</sub> <sup>-</sup> + CO <sub>2</sub>     | 9.28                      | 7.29 μmol cm <sup>-2</sup> h <sup>-1</sup>      | -1.02                    | 24               |
| V <sub>o</sub> -CeO <sub>2</sub> -750 | NO <sub>3</sub> <sup>-</sup> + CO <sub>2</sub>     | -                         | 943.6 μg h <sup>-1</sup> mg <sup>-1</sup>       | -1.6                     | 25               |
| B-FeNi-DASC                           | NO <sub>3</sub> <sup>-</sup> + CO <sub>2</sub>     | 17.8                      | 20.2 mmol h <sup>-1</sup> g <sup>-1</sup>       | -1.5                     | 26               |
| AuPd                                  | NO <sub>3</sub> <sup>-</sup> + CO <sub>2</sub>     | 15.6                      | 204.2 μg mg <sup>-1</sup> h <sup>-1</sup>       | -0.5                     | 27               |
| <b>H-PdZn bimetallic</b>              | <b>NO<sub>3</sub><sup>-</sup> + CO<sub>2</sub></b> | <b>24.39</b>              | <b>314.17 μg mg<sup>-1</sup> h<sup>-1</sup></b> | <b>-0.5</b>              | <b>This work</b> |

## References

- 1 Y. Zhao, Y. Ding, W. Li, C. Liu, Y. Li, Z. Zhao, Y. Shan, F. Li, L. Sun and F. Li, *Nat. Commun.*, 2023, **14**, 4491.
- 2 C. Lv, C. Lee, L. Zhong, H. Liu, J. Liu, L. Yang, C. Yan, W. Yu, H. H. Hng, Z. Qi, L. Song, S. Li, K. P. Loh, Q. Yan and G. Yu, *ACS Nano*, 2022, **16**, 8213-8222.
- 3 L. Lv, H. Tan, Y. Kong, B. Tang, Q. Ji, Y. Liu, C. Wang, Z. Zhuang, H. Wang, M. Ge, M. Fan, D. Wang and W. Yan, *Angew. Chem., Int. Ed.*, 2024, **63**, e202401943.
- 4 J. Fan, J. Wu, X. Cui, L. Gu, Q. Zhang, F. Meng, B.-H. Lei, D. J. Singh and W. Zheng, *J. Am. Chem. Soc.*, 2020, **142**, 3645-3651.
- 5 S. J. Hwang, S.-K. Kim, J.-G. Lee, S.-C. Lee, J. H. Jang, P. Kim, T.-H. Lim, Y.-E. Sung and S. J. Yoo, *J. Am. Chem. Soc.*, 2012, **134**, 19508-19511.
- 6 W. P. Zhou, A. Lewera, R. Larsen, R. I. Masel, P. S. Bagus and A. Wieckowski, *J. Phys. Chem. B*, 2006, **110**, 13393-13398.
- 7 G. Kresse and J. Furthmuller, *Comput. Mater. Sci.*, 1996, **6**, 15-50.
- 8 G. Kresse and J. Hafner, *Phys. Rev. B*, 1993, **47**, 558-561.
- 9 P. E. Blöchl, *Phys. Rev. B*, 1994, **50**, 17953-17979.
- 10 J. P. Perdew, K. Burke and M. Ernzerhof, *Phys. Rev. Lett.*, 1996, **77**, 3865-3868.
- 11 J. K. Nørskov, J. Rossmeisl, A. Logadottir, L. Lindqvist, J. R. Kitchin, T. Bligaard and H. Jonsson, *J. Phys. Chem. B*, 2004, **108**, 17886-17892.
- 12 V. Wang, N. Xu, J.-C. Liu, G. Tang and W.-T. Geng, *Comput. Phys. Commun.*, 2021, **267**, 108033.
- 13 K. Momma and F. Izumi, *J. Appl. Crystallogr.*, 2011, **44**, 1272-1276.

- 14 C. Chen, X. Zhu, X. Wen, Y. Zhou, L. Zhou, H. Li, L. Tao, Q. Li, S. Du, T. Liu, D. Yan, C. Xie, Y. Zou, Y. Wang, R. Chen, J. Huo, Y. Li, J. Cheng, H. Su, X. Zhao, W. Cheng, Q. Liu, H. Lin, J. Luo, J. Chen, M. Dong, K. Cheng, C. Li and S. Wang, *Nat. Chem.*, 2020, **12**, 717-724.
- 15 M. Yuan, J. Chen, Y. Bai, Z. Liu, J. Zhang, T. Zhao, Q. Wang, S. Li, H. He and G. Zhang, *Angew. Chem., Int. Ed.*, 2021, **60**, 10910-10918.
- 16 M. Yuan, J. Chen, Y. Bai, Z. Liu, J. Zhang, T. Zhao, Q. Shi, S. Li, X. Wang and G. Zhang, *Chem. Sci.*, 2021, **12**, 6048-6058.
- 17 M. Yuan, J. Chen, Y. Xu, R. Liu, T. Zhao, J. Zhang, Z. Ren, Z. Liu, C. Streb, H. He, C. Yang, S. Zhang and G. Zhang, *Energy Environ. Sci.*, 2021, **14**, 6605-6615.
- 18 W. Wu, Y. Yang, Y. Wang, T. Lu, Q. Dong, J. Zhao, J. Niu, Q. Liu, Z. Hao and S. Song, *Chem Catal.*, 2022, **2**, 3225-3238.
- 19 M. Yuan, H. Zhang, Y. Xu, R. Liu, R. Wang, T. Zhao, J. Zhang, Z. Liu, H. He, C. Yang, S. Zhang and G. Zhang, *Chem Catal.*, 2022, **2**, 309-320.
- 20 Y. Feng, H. Yang, Y. Zhang, X. Huang, L. Li, T. Cheng and Q. Shao, *Nano Lett.*, 2020, **20**, 8282-8289.
- 21 N. Cao, Y. Quan, A. Guan, C. Yang, Y. Ji, L. Zhang and G. Zheng, *J. Colloid Interface Sci.*, 2020, **577**, 109-114.
- 22 N. Meng, Y. Huang, Y. Liu, Y. Yu and B. Zhang, *Cell Rep. Phys. Sci.*, 2021, **2**, 100378.
- 23 Y. Huang, R. Yang, C. Wang, N. Meng, Y. Shi, Y. Yu and B. Zhang, *ACS Energy Lett.*, 2022, **7**, 284-291.
- 24 N. Meng, X. Ma, C. Wang, Y. Wang, R. Yang, J. Shao, Y. Huang, Y. Xu, B. Zhang and Y. Yu, *ACS Nano*, 2022, **16**, 9095-9104.

- 25 X. Wei, X. Wen, Y. Liu, C. Chen, C. Xie, D. Wang, M. Qiu, N. He, P. Zhou, W. Chen, J. Cheng, H. Lin, J. Jia, X.-Z. Fu and S. Wang, *J. Am. Chem. Soc.*, 2022, **144**, 11530-11535.
- 26 X. Zhang, X. Zhu, S. Bo, C. Chen, M. Qiu, X. Wei, N. He, C. Xie, W. Chen, J. Zheng, P. Chen, S. P. Jiang, Y. Li, Q. Liu and S. Wang, *Nat. Commun.*, 2022, **13**, 5337.
- 27 H. Wang, Y. Jiang, S. Li, F. Gou, X. Liu, Y. Jiang, W. Luo, W. Shen, R. He and M. Li, *Appl. Catal., B*, 2022, **318**, 121819.
